# Supplementary material for: Synthesis, characterization, and catalytic activity of sodium ketminiate complexes toward the ring-opening polymerization of l-lactide
Source: Royal Society of Chemistry journal article supplement (doi:10.1039/c6ra00373g), 2016-01-01
Supplement: c6ra00373g1.pdf [file c6ra00373g1.pdf]

**Synthesis, Characterization, and Catalytic Activity of Sodium Ketminiate  
Complexes toward the Ring-Opening Polymerization of *L*-Lactide**

Wan-Jung Chuang,<sup>a</sup> Yen-Tzu Huang,<sup>a</sup> Yu-Hsieh Chen,<sup>a</sup> Yu-Shan Lin,<sup>a</sup> Wei-Yi Lu,<sup>a</sup>  
Yi-Chun Lai,<sup>a</sup> Michael Y. Chiang,<sup>\*a,b</sup> Sodio C. N. Hsu,<sup>\*a</sup> Hsuan-Ying Chen<sup>\*a</sup>

<sup>a</sup> *Department of Medicinal and Applied Chemistry, Kaohsiung Medical University,  
Kaohsiung 80708, Taiwan, R.O.C.*

<sup>b</sup> *Department of Chemistry, National Sun Yat-sen University, Kaohsiung, Taiwan,  
80424, R.O.C.*

**Electronic Supplementary Information Available:** X-ray crystallography data and

<sup>1</sup>H and <sup>13</sup>C NMR spectrum of Na complexes

**Table S1.** Summary of X-ray Crystallography Data of L<sup>Py</sup>-

Na.....2

**Figure S1-S10.** <sup>1</sup>H and <sup>13</sup>C NMR spectrum of Na complexes.....3-12

**Figure S11-S33.** All the GPC results of the PLA.....13-24

**Table S1.** Summary of X-ray Crystallography Data of L<sup>Pv</sup>-Na

|                                |                                             |
|--------------------------------|---------------------------------------------|
| Emp. Formula                   | C11 H13 N2 Na O                             |
| Form. Weight                   | 212.22                                      |
| Crystal system                 | Monoclinic                                  |
| Space group                    | C 1 2/c 1                                   |
| a (Å)                          | 37.8452(19)                                 |
| b (Å)                          | 15.6845(5)                                  |
| c (Å)                          | 17.0802(10)                                 |
| α(°)                           | 90°                                         |
| β(°)                           | 116.801(7)°                                 |
| γ(°)                           | 90°                                         |
| Volume (Å <sup>3</sup> )       | 9049.4(8)                                   |
| Z                              | 32                                          |
| Density                        | 1.246 Mg/m <sup>3</sup>                     |
| F(000)                         | 3584                                        |
| Crystal size(mm <sup>3</sup> ) | 0.3 x 0.3 x 0.2                             |
| θ range                        | 2.78 to 26.00°                              |
| Index ranges                   | -43<=h<=46<br>-19<=k<=19<br>-20<=l<=21      |
| Ref. collected                 | 28279                                       |
| Ind. Reflections               | 8697 [R(int) = 0.0384]                      |
| Complete to θ                  | 97.7 %                                      |
| Max. and min transmission      | 1.000000 and 0.97136                        |
| Data / Restraints/ parameters  | 8697 / 0 / 541                              |
| GOF                            | 1.038                                       |
| Final R indices                | R1 = 0.0639                                 |
| [I > 2 sigma (I)]              | wR2 = 0.1781                                |
| R indices<br>(all data)        | R1 = 0.0954<br>wR2 = 0.2021                 |
| Largest diff. Peak and hole    | 0.562 and -0.447 e.Å <sup>-3</sup>          |
| Temperature                    | 110(2) K                                    |
| Wavelength                     | 0.71073 Å                                   |
| Abs. correction                | SADABS                                      |
| Refine. Method                 | Full-matrix least-squares on F <sup>2</sup> |

$$^aR1=|(F_o|-|F_c|)/|F_o|.$$

$${}^bR2 = \{[w(F_o^2 - F_c^2)^2] / [w](F_o^2)^2\}^{1/2}, w = 0.10.$$

$${}^cGoF = [w(F_o^2 - F_c^2)^2] / (N_{\text{reflms}} - N_{\text{params}})^{1/2}.$$

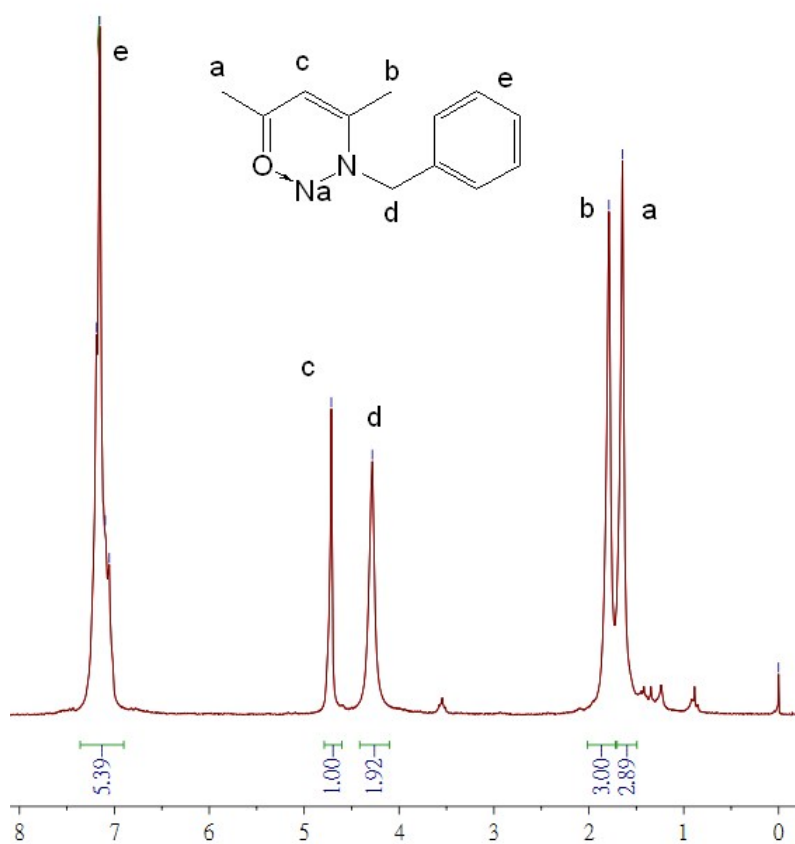

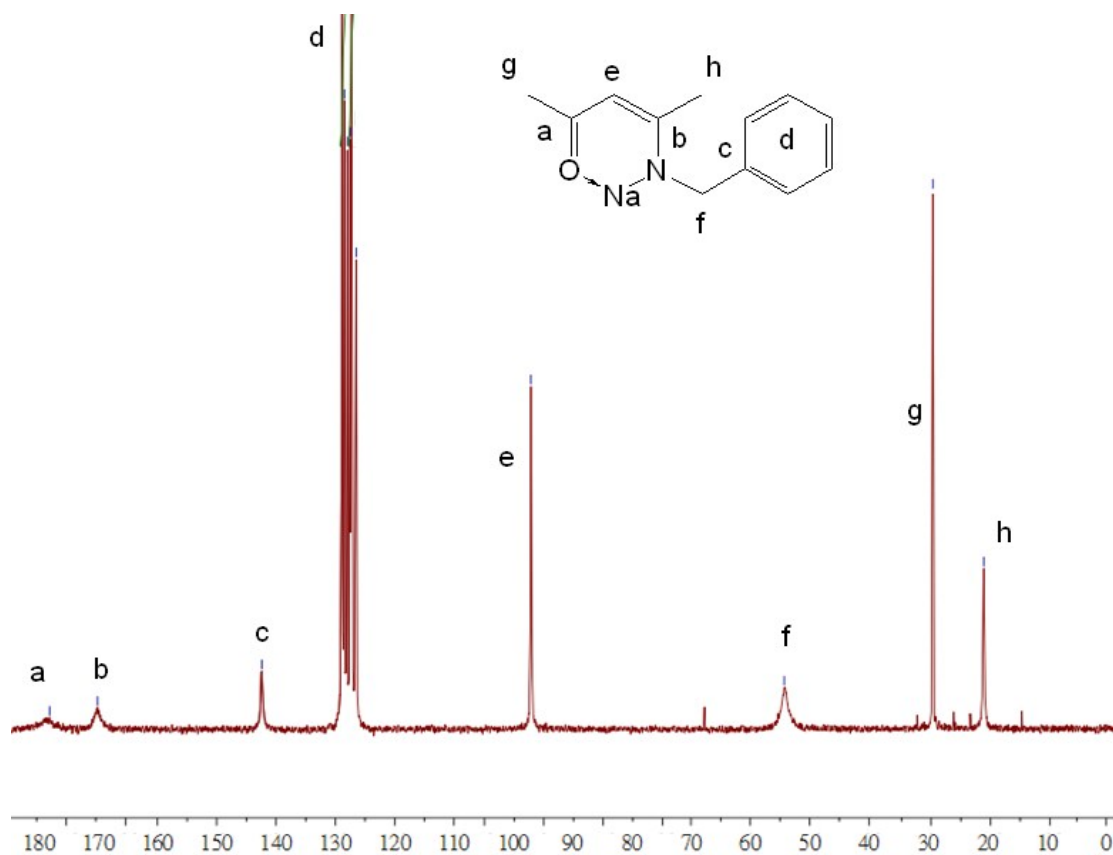

**Figure S1.**  $^1\text{H}$  and  $^{13}\text{C}$  NMR spectrum of  $\text{L}^{\text{Bn}}\text{-Na}$

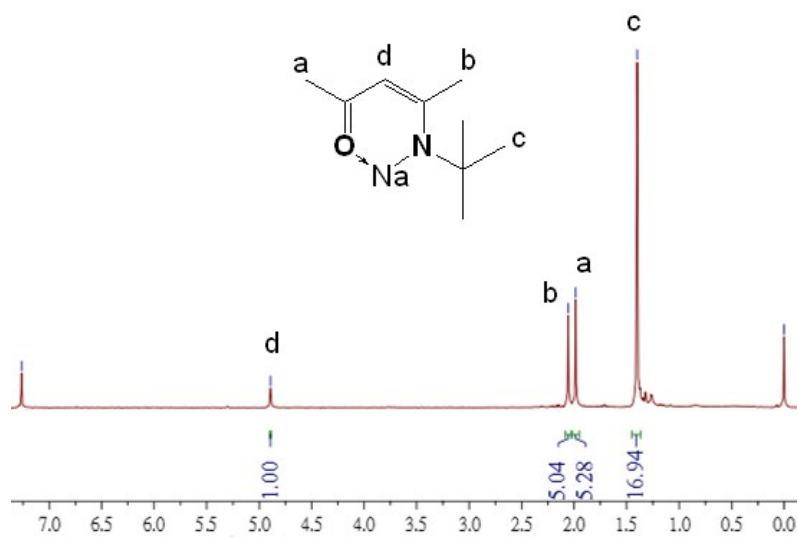

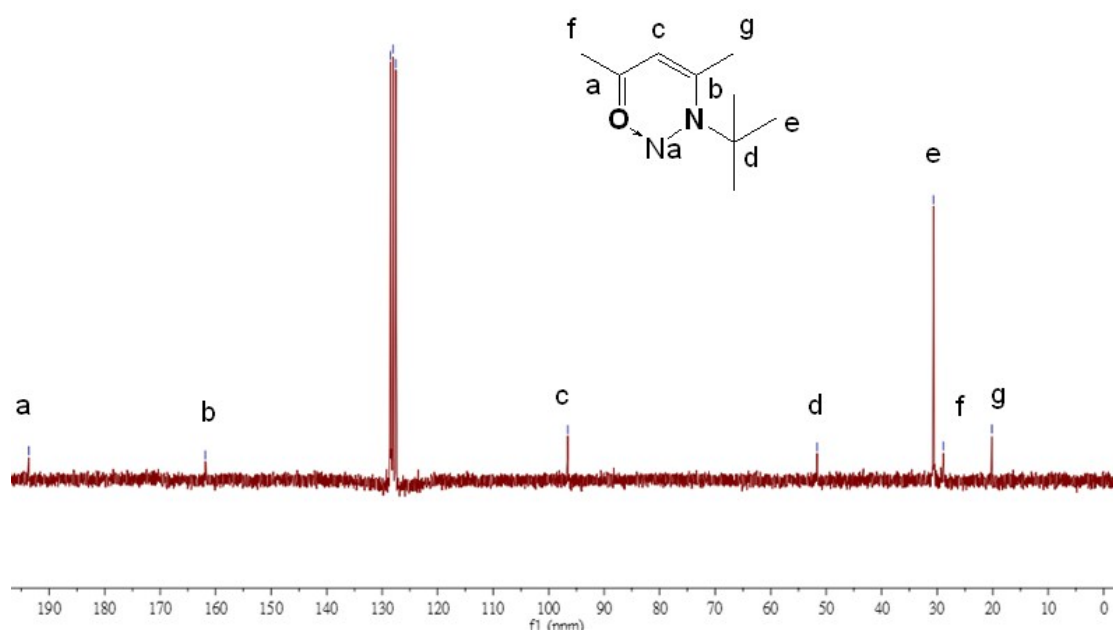

**Figure S2.**  $^1\text{H}$  and  $^{13}\text{C}$  NMR spectrum of  $\text{L}^{\text{Bu}}\text{-Na}$

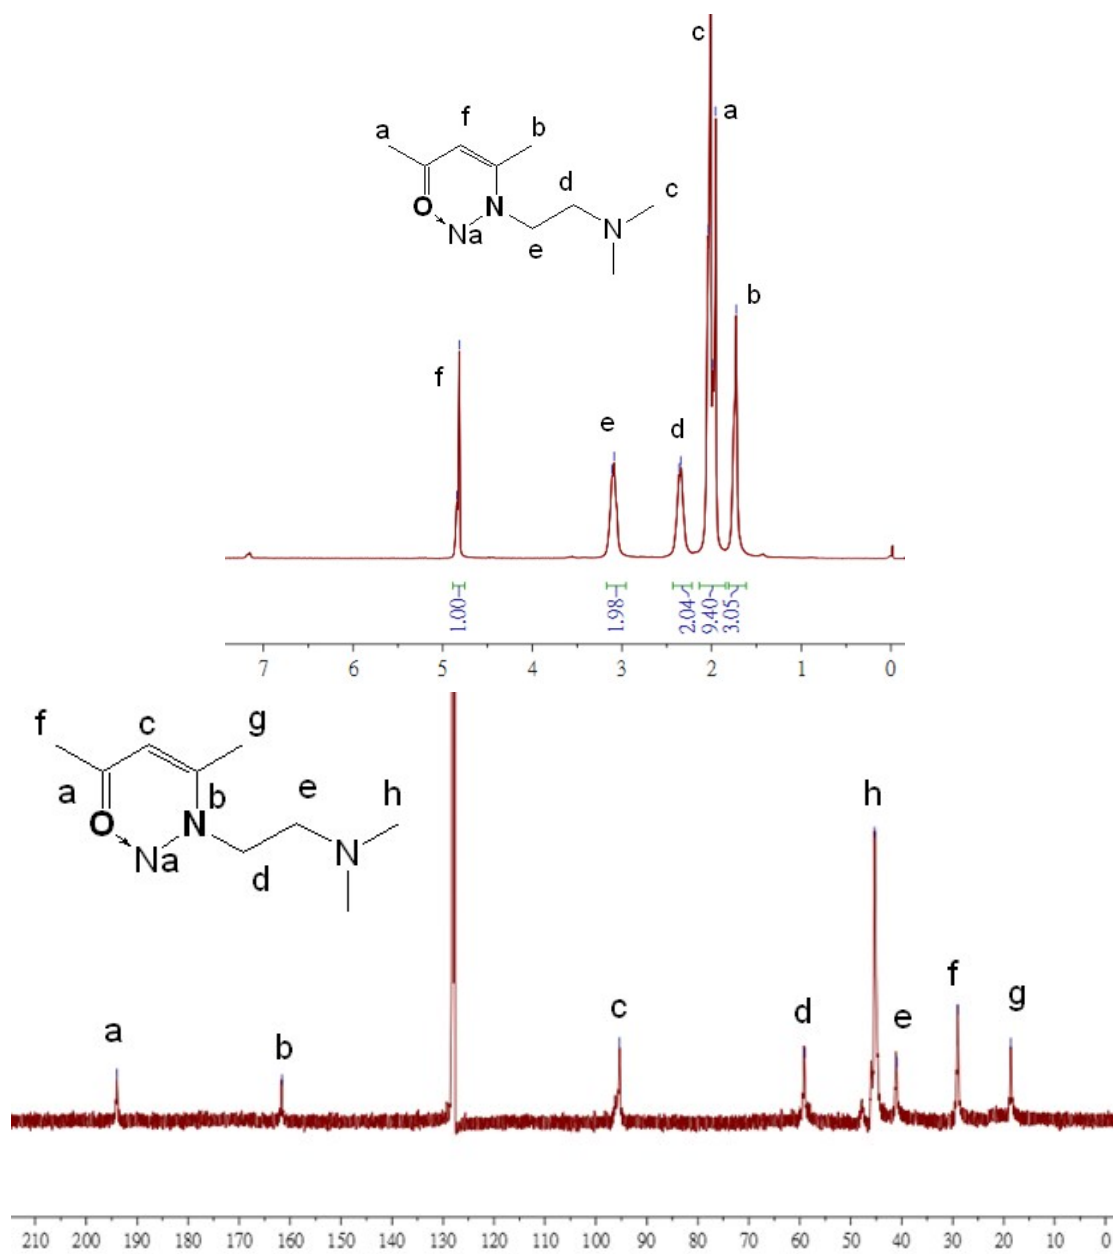

Figure S3.  $^1H$  and  $^{13}C$  NMR spectrum of  $L^{C2N-Na}$

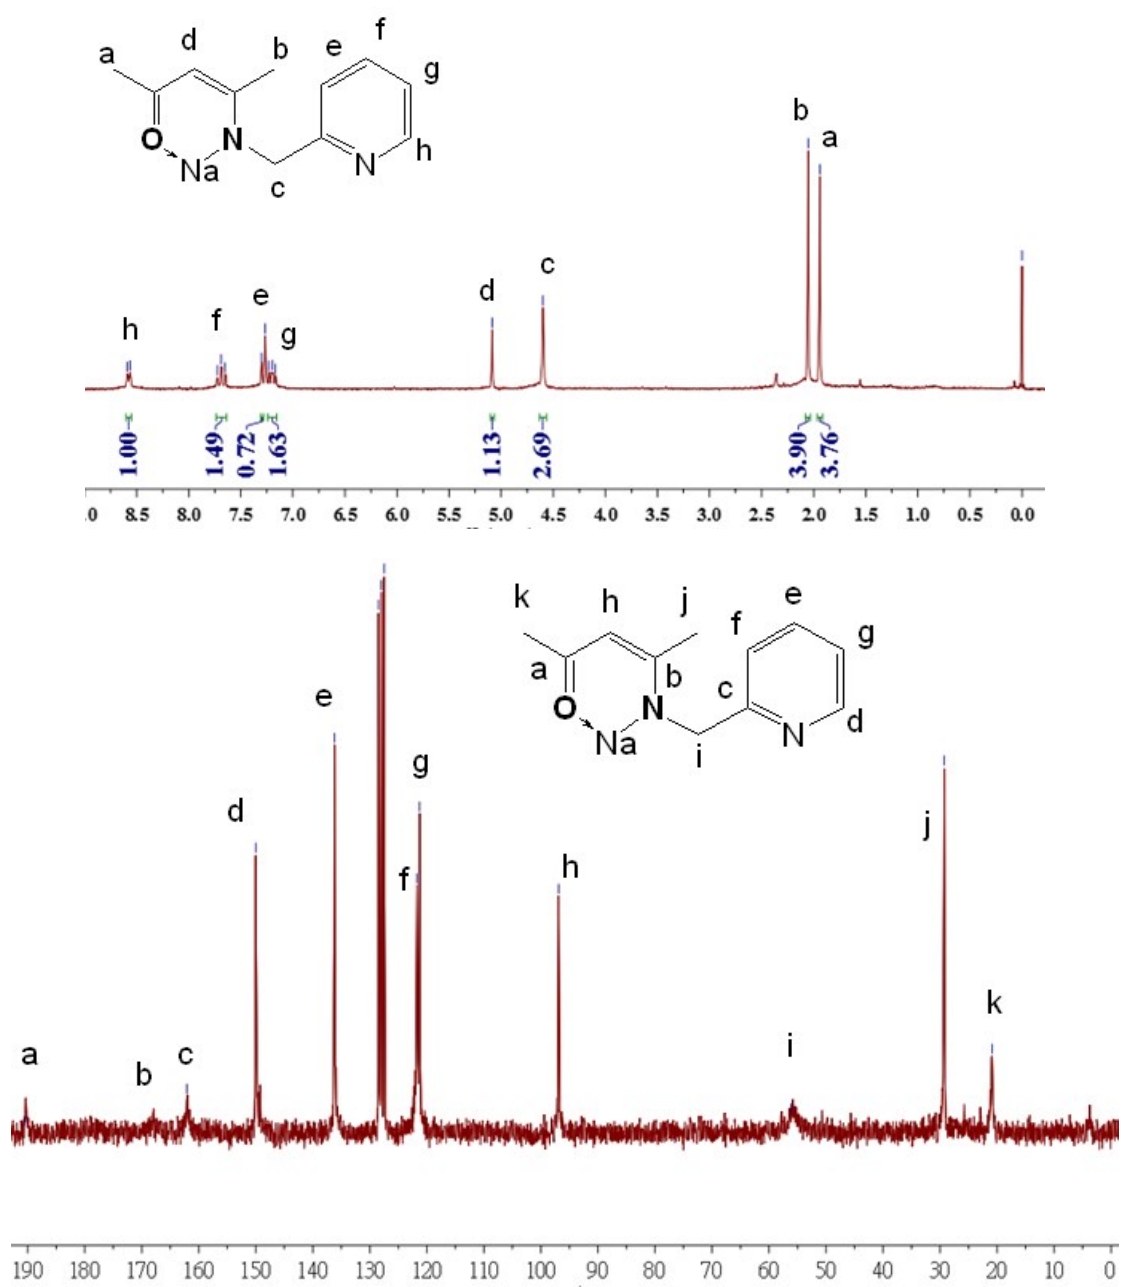

**Figure S4.**  $^1H$  and  $^{13}C$  NMR spectrum of  $L^{Py-Na}$

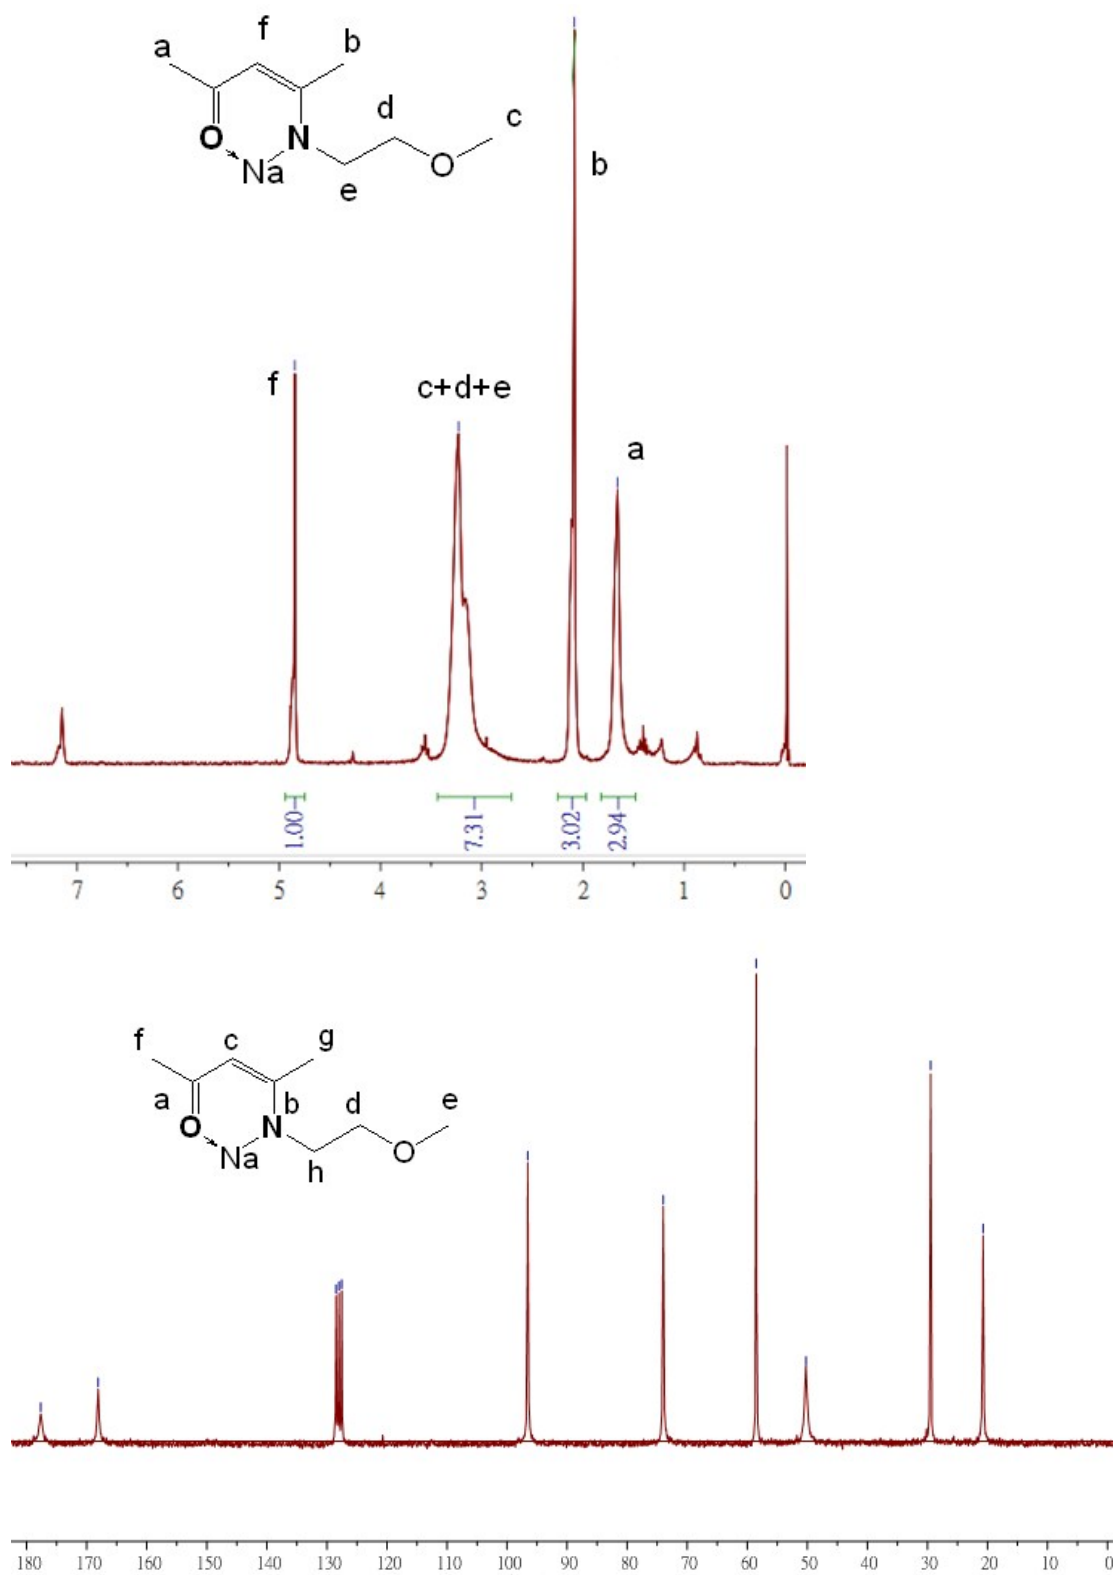

Figure S5.  $^1H$  and  $^{13}C$  NMR spectrum of  $L^{C20-Na}$



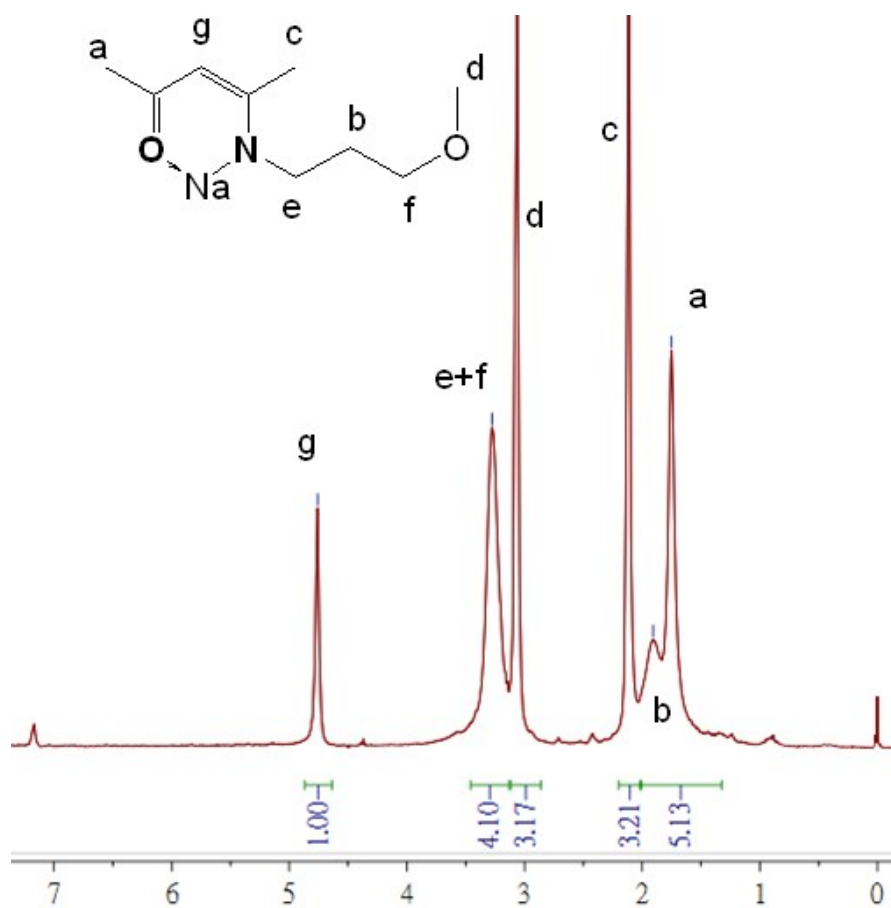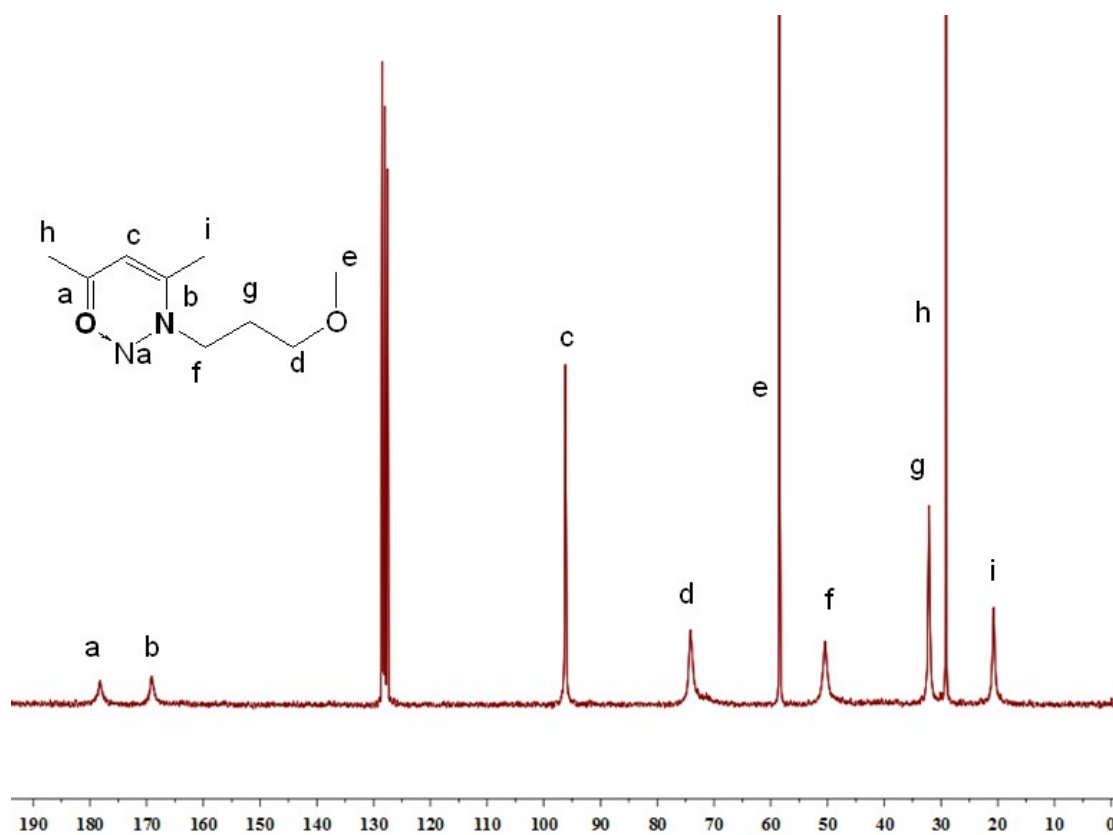

Figure S6.  $^1\text{H}$  and  $^{13}\text{C}$  NMR spectrum of  $\text{LC}^{30}\text{-Na}$

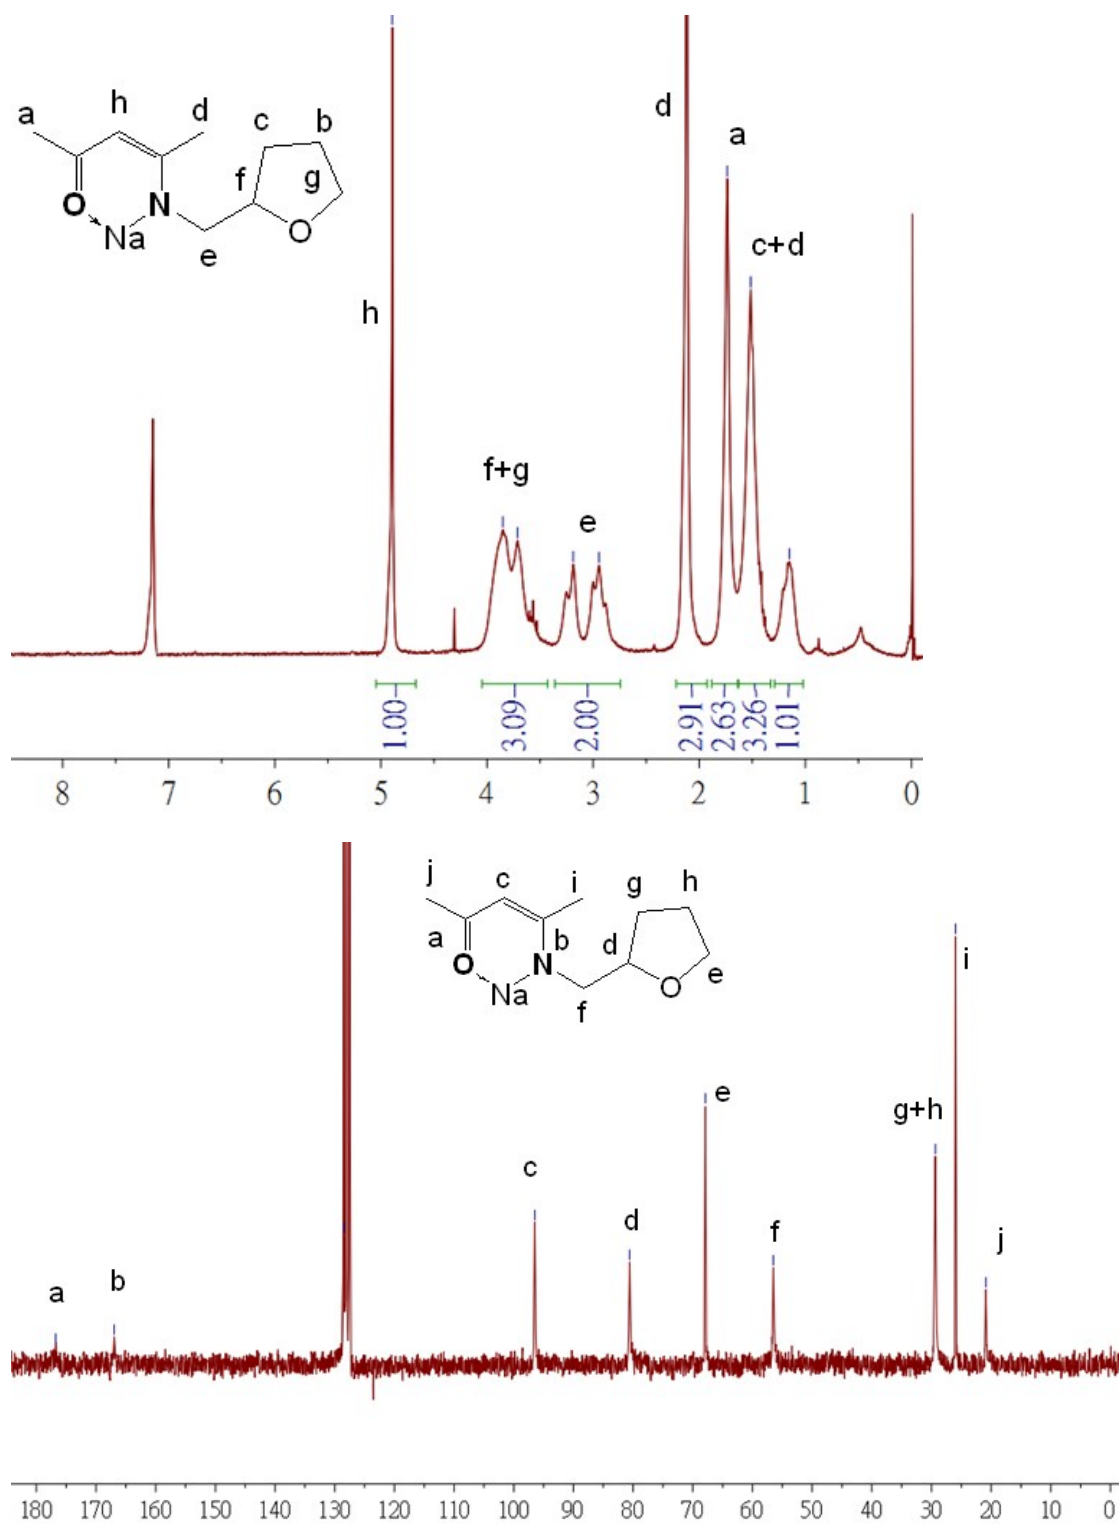

Figure S7.  $^1H$  and  $^{13}C$  NMR spectrum of  $L^{THF-Na}$

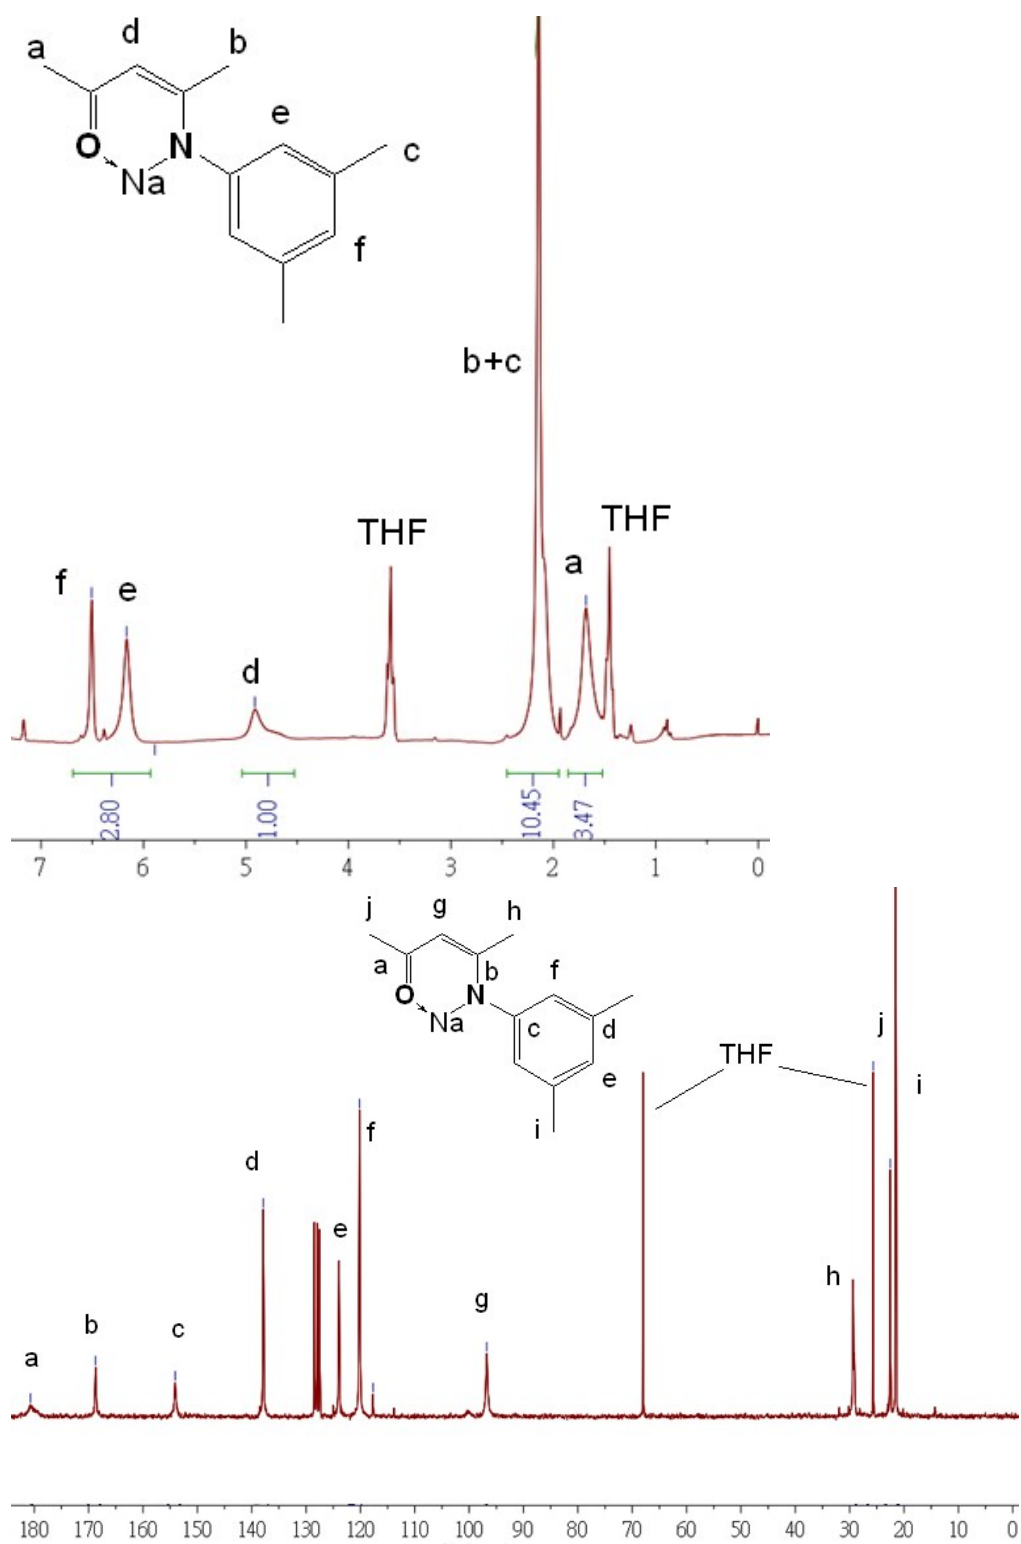

**Figure S8.**  $^1\text{H}$  and  $^{13}\text{C}$  NMR spectrum of  $L^{PhC2}\text{-Na}$

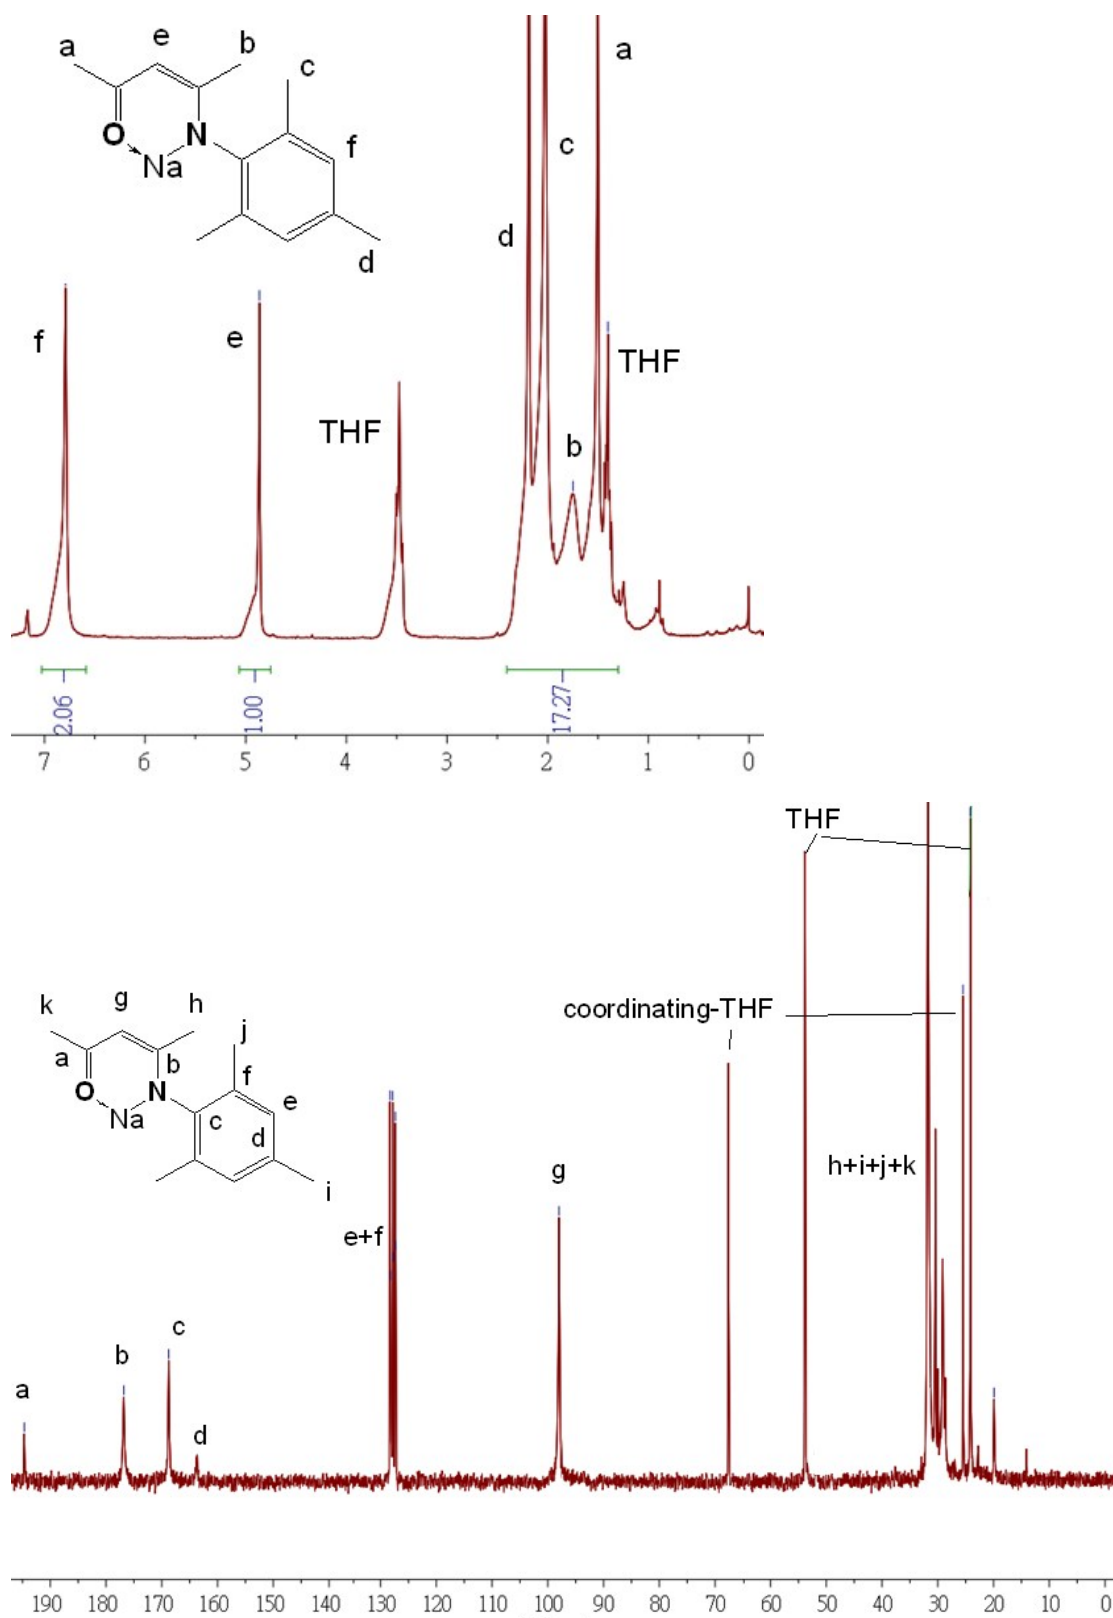

**Figure S9.**  $^1H$  and  $^{13}C$  NMR spectrum of  $L^{PhC3-Na}$

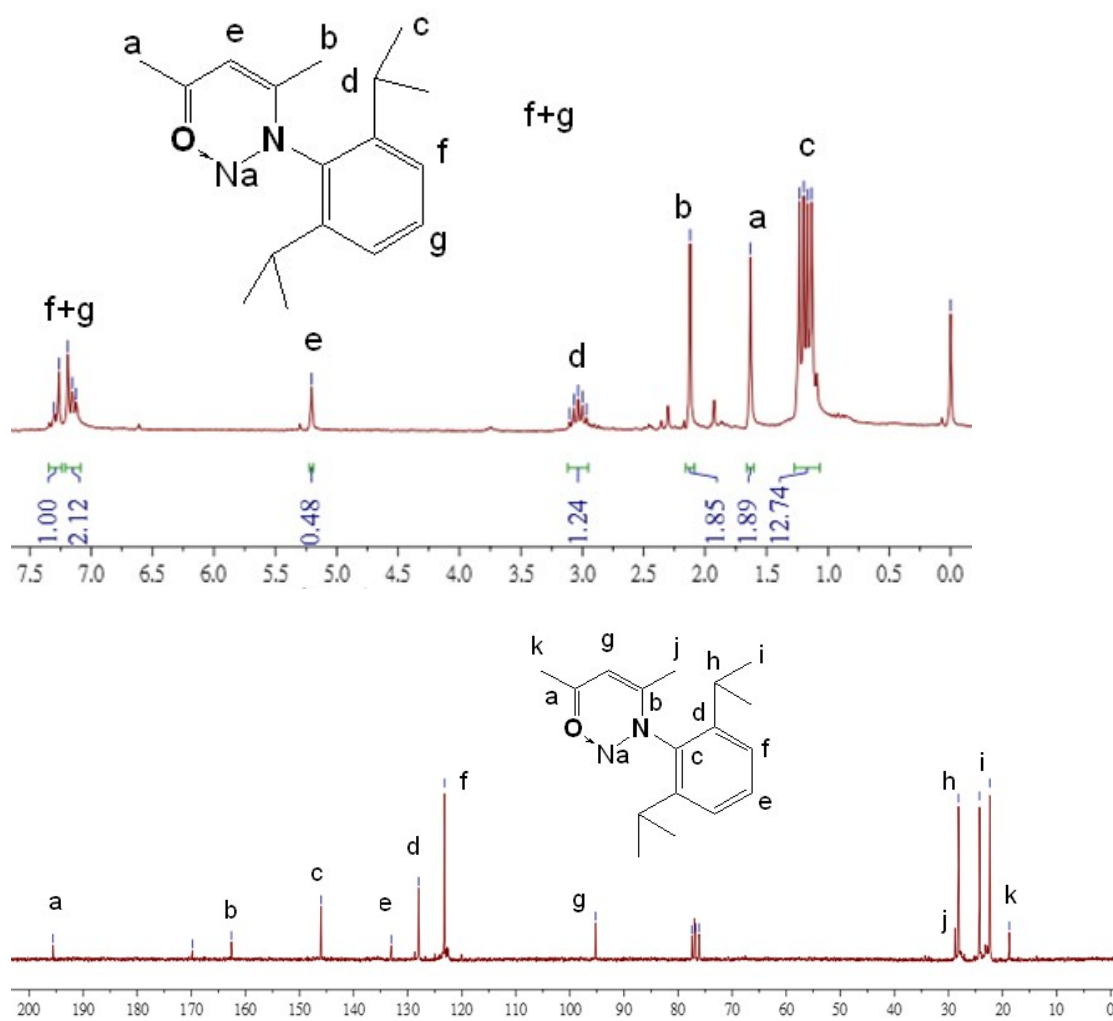

Figure S10.  $^1\text{H}$  and  $^{13}\text{C}$  NMR spectrum of  $L^{\text{PhiPr-Na}}$

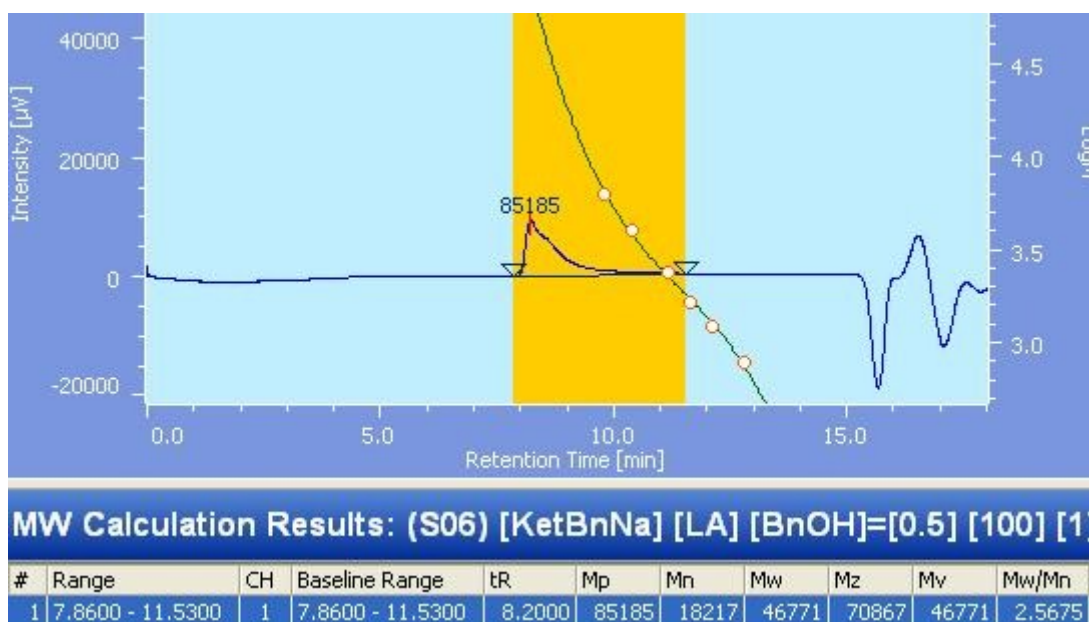

Figure S11. GPC result of PLA of entry 1

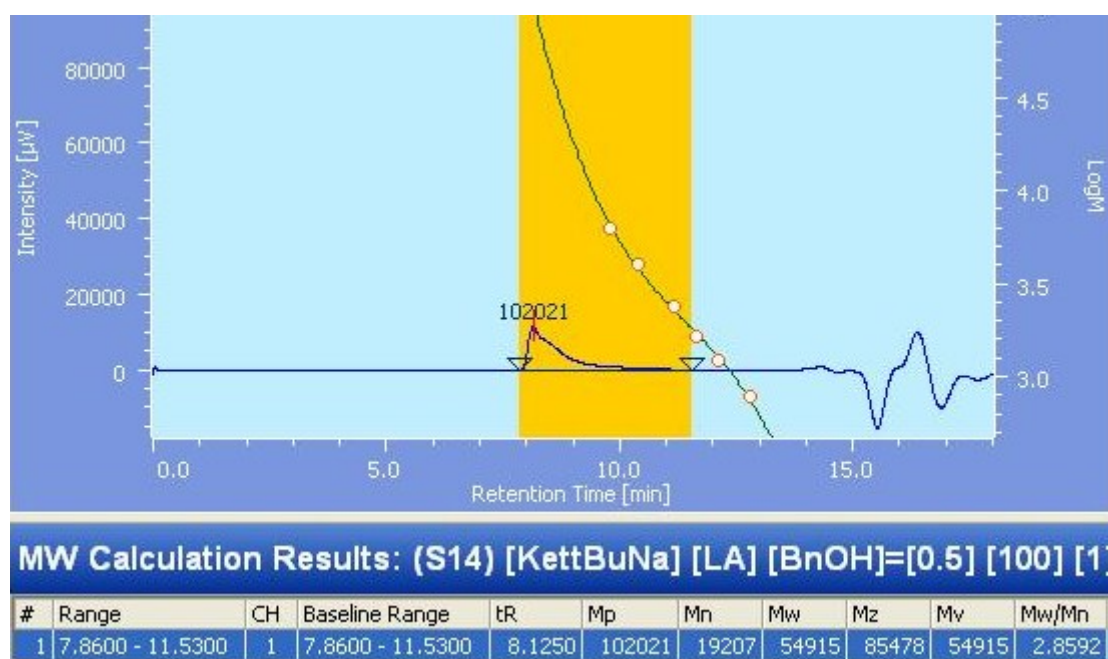

Figure S12. GPC result of PLA of entry 2

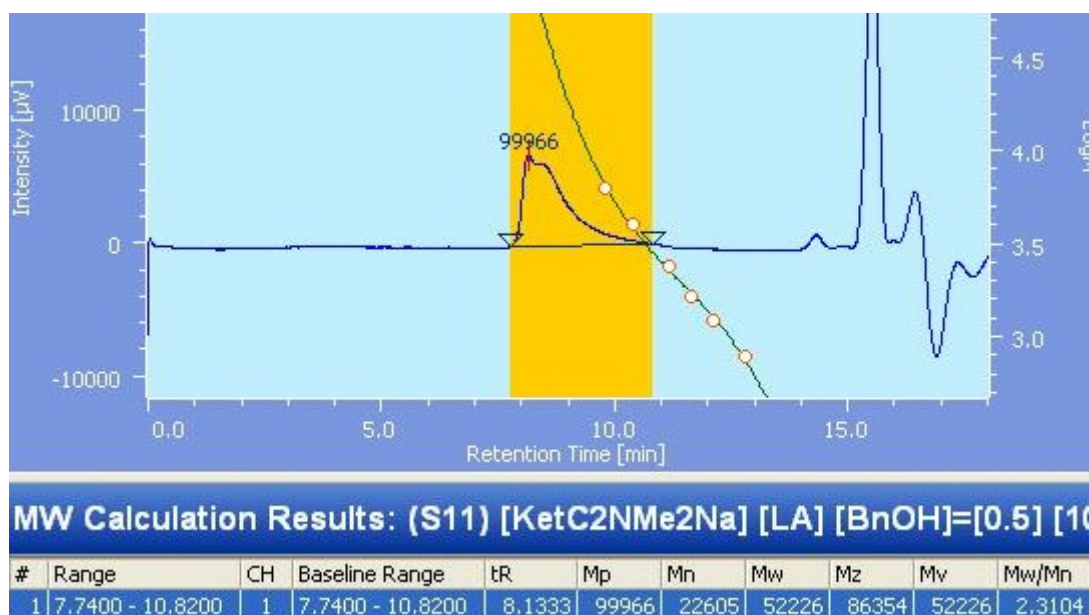

Figure S13. GPC result of PLA of entry 3

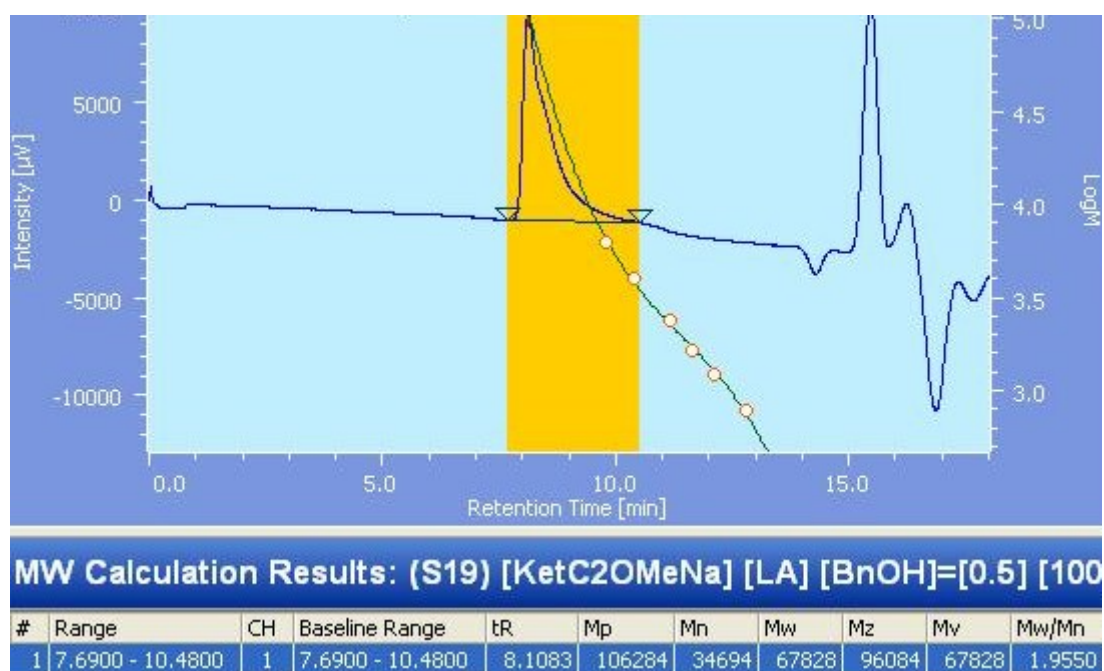

Figure S14. GPC result of PLA of entry 4

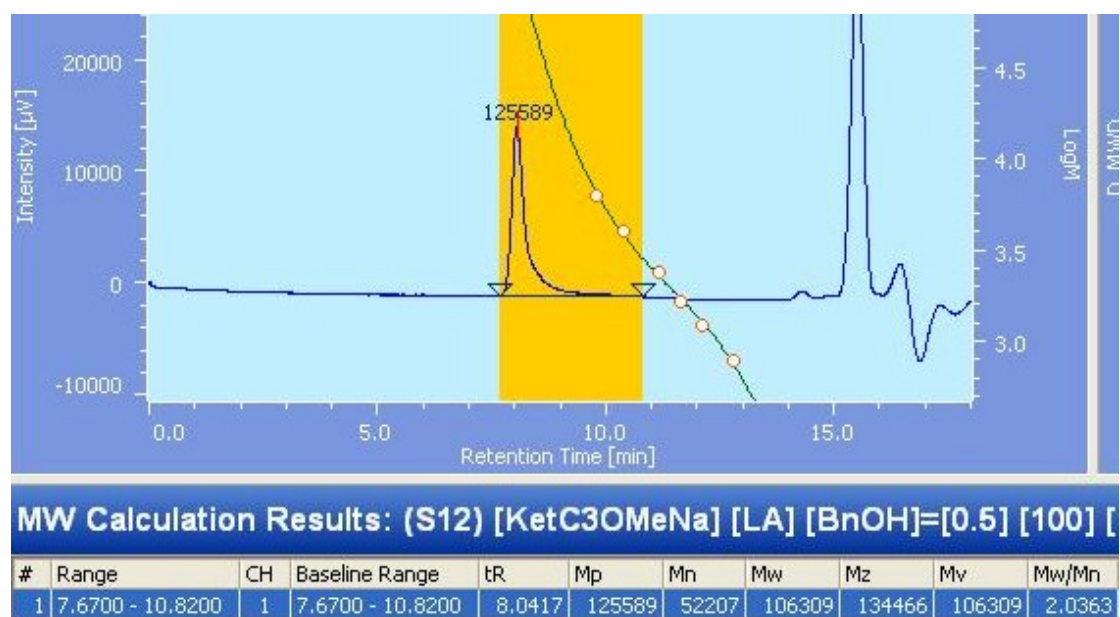

**Figure S15.** GPC result of PLA of entry 5

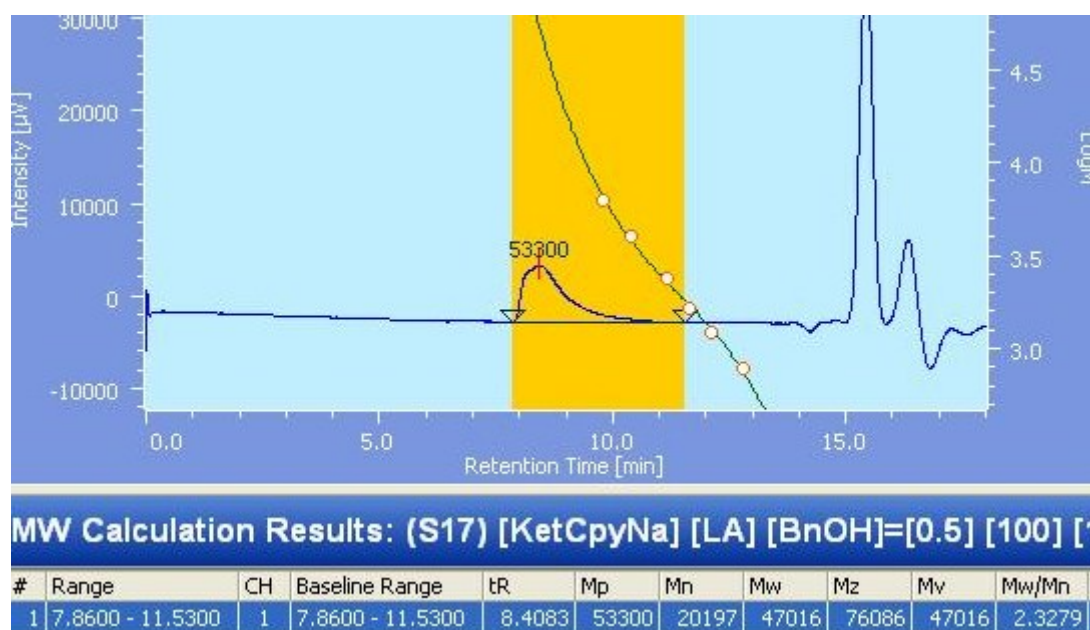

**Figure S16.** GPC result of PLA of entry 6



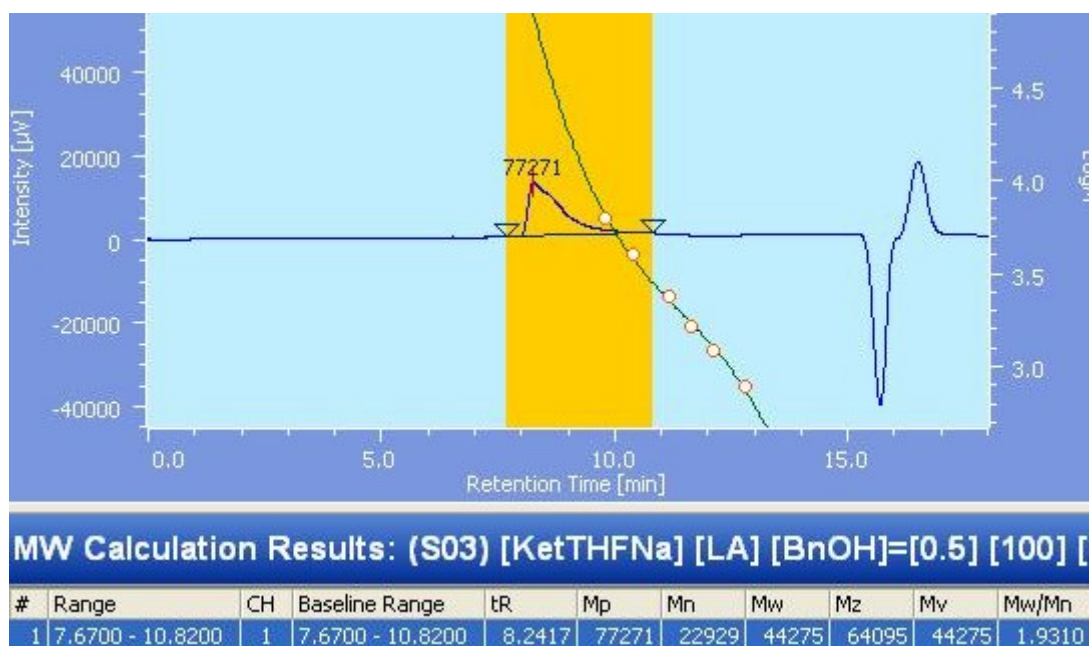

**Figure S17.** GPC result of PLA of entry 7

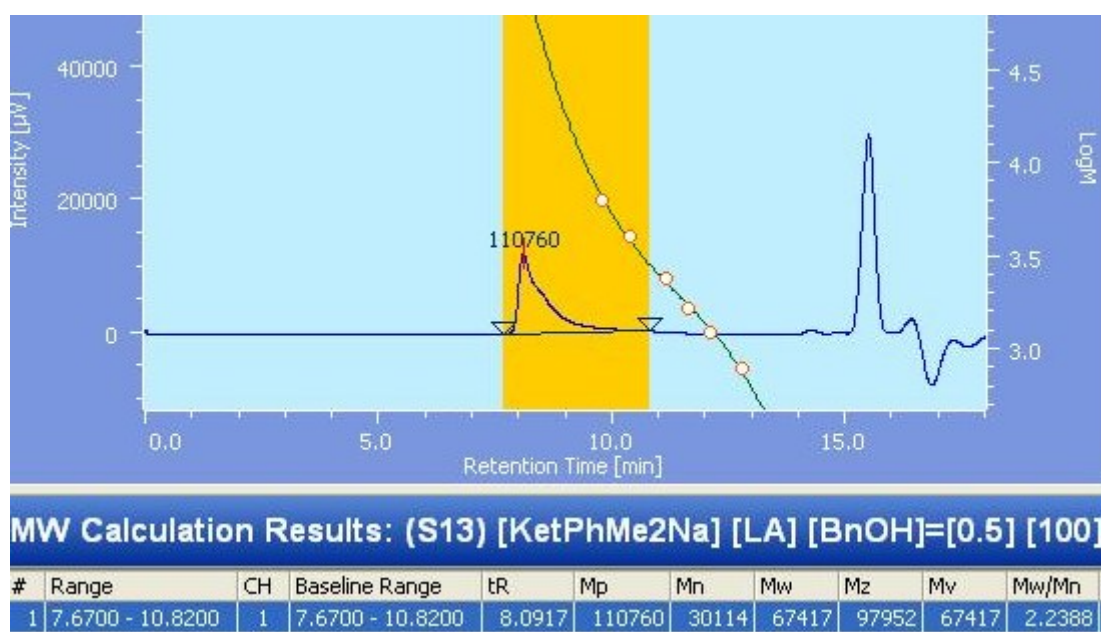

**Figure S18.** GPC result of PLA of entry 8

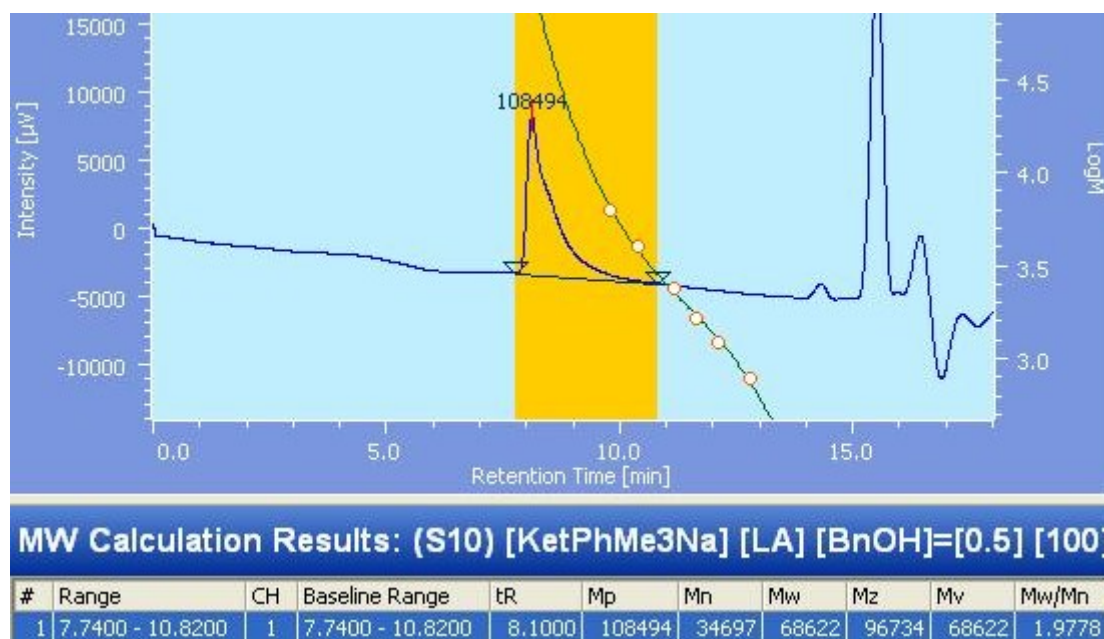

**Figure S19.** GPC result of PLA of entry 9

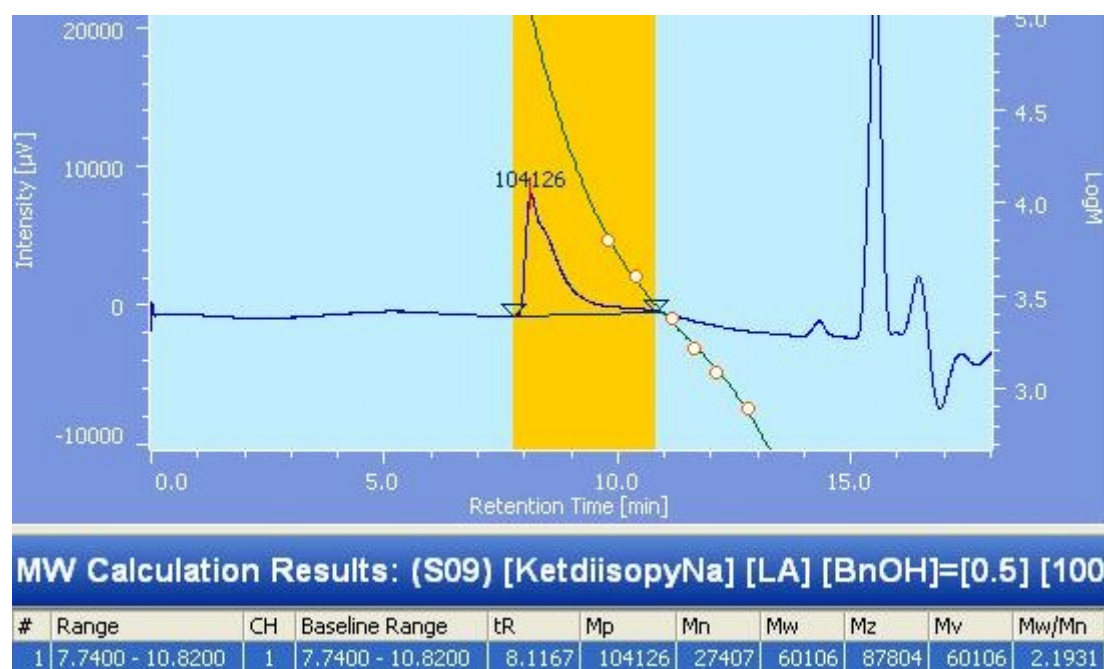

**Figure S20.** GPC result of PLA of entry 10

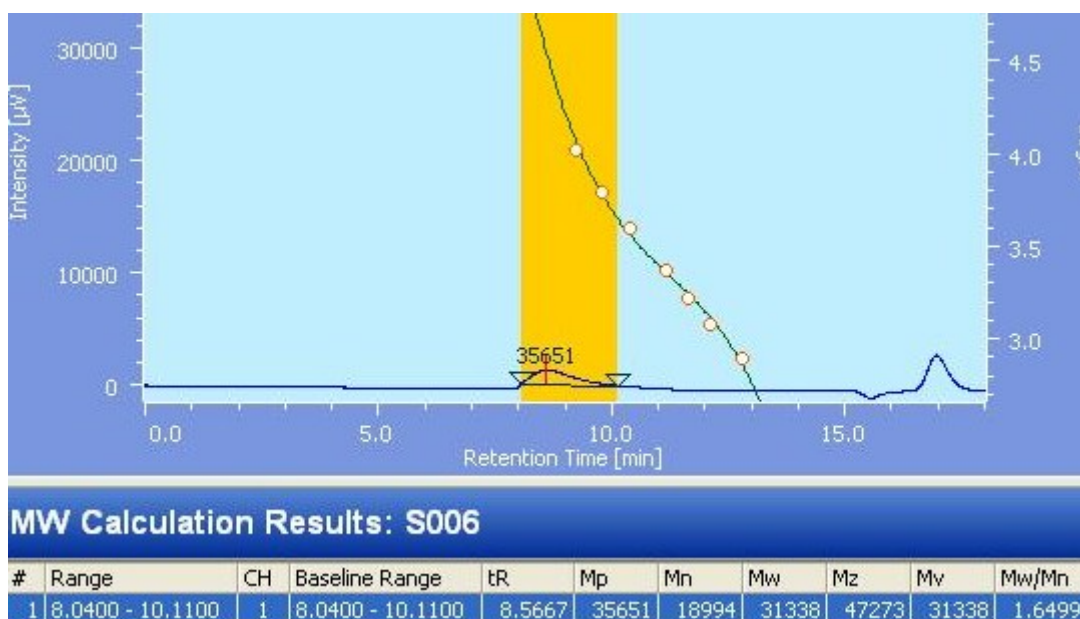

**Figure S21.** GPC result of PLA of entry 11

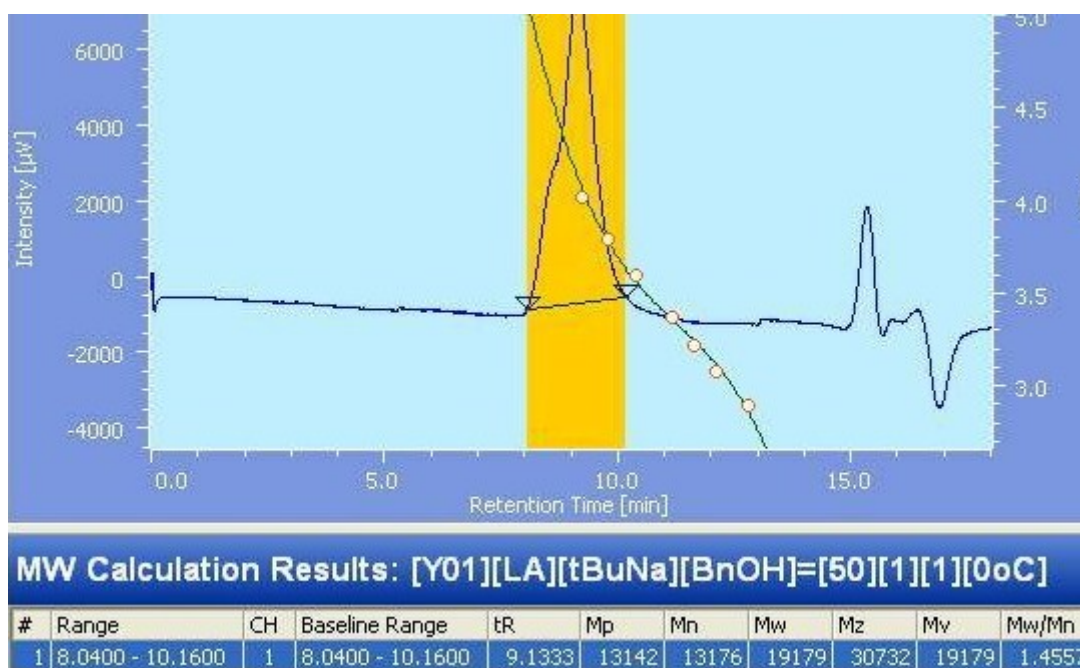

**Figure S22.** GPC result of PLA of entry 12

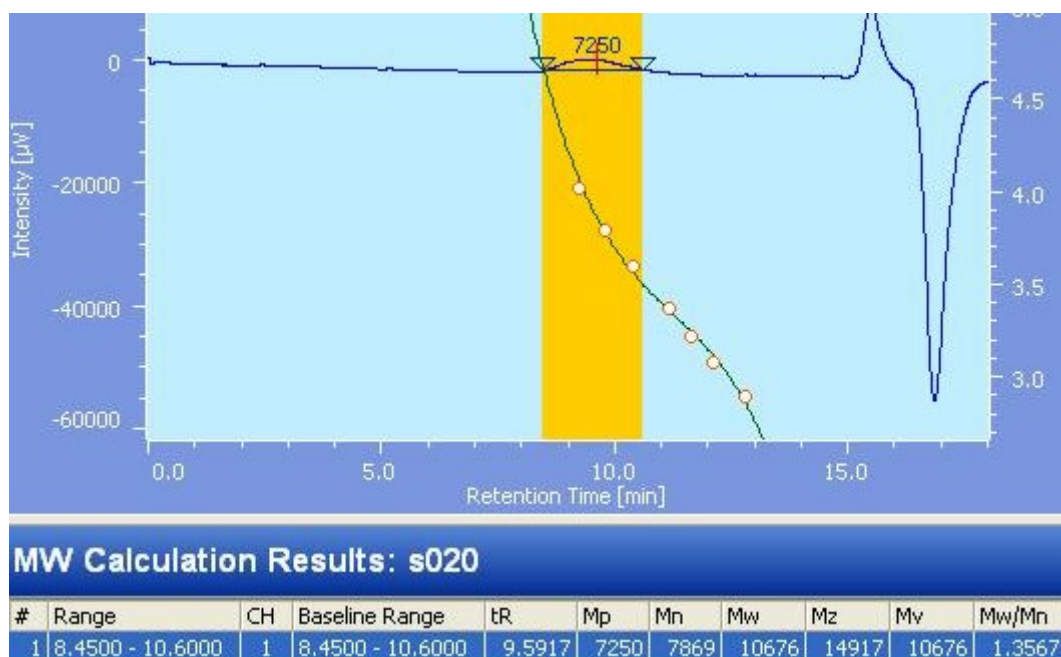

**Figure S23.** GPC result of PLA of entry 14

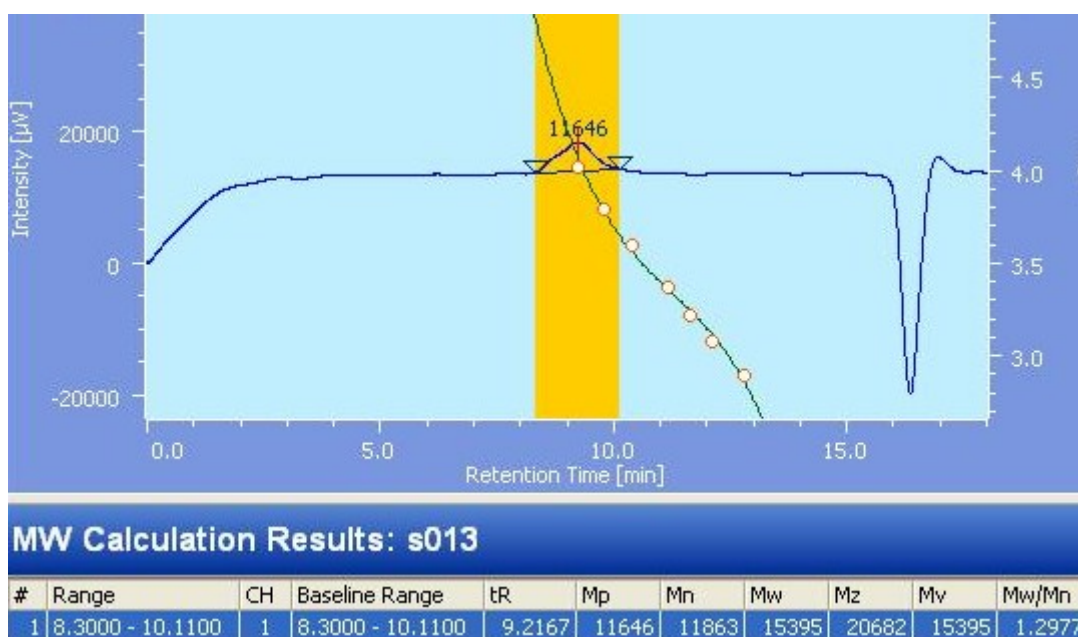

**Figure S24.** GPC result of PLA of entry 15

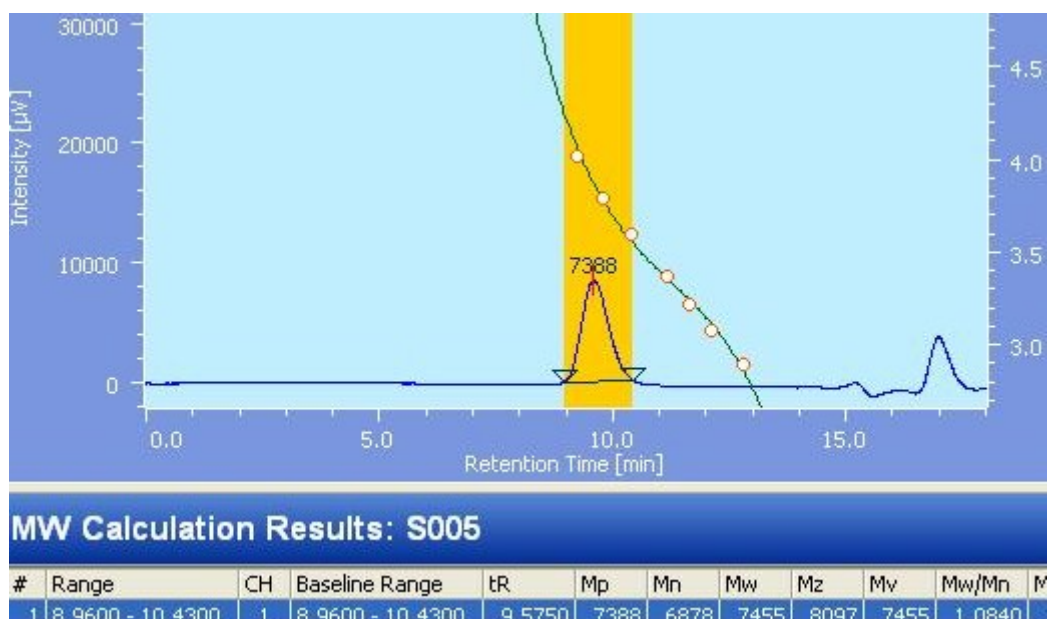

Figure S25. GPC result of PLA of entry 16

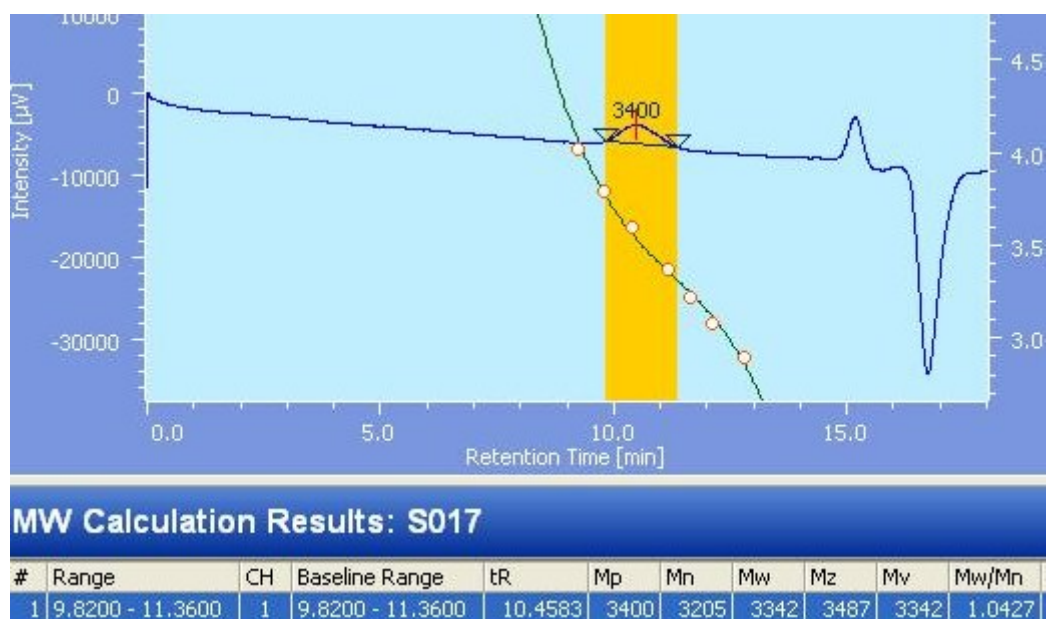

Figure S26. GPC result of PLA of entry 17

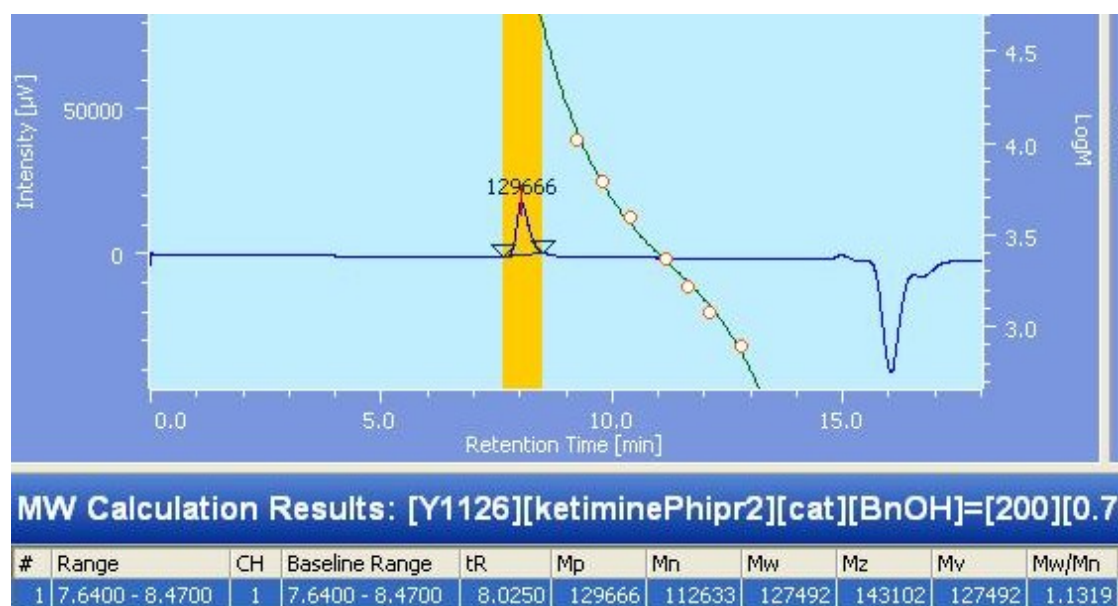

**Figure S27.** GPC result of PLA of entry 20

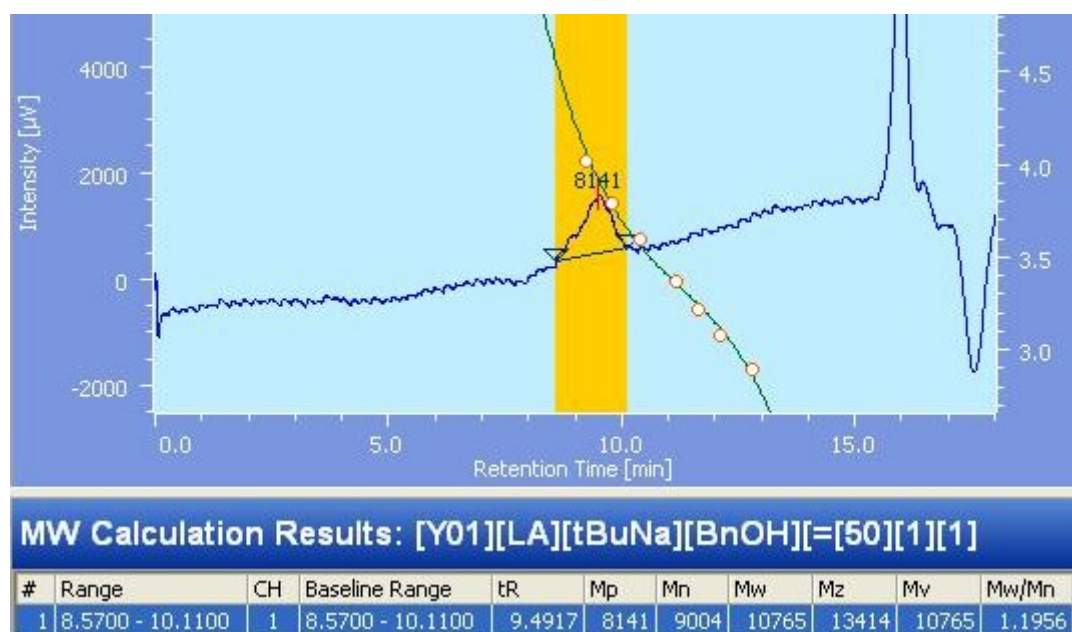

**Figure S28.** GPC result of PLA of entry 21

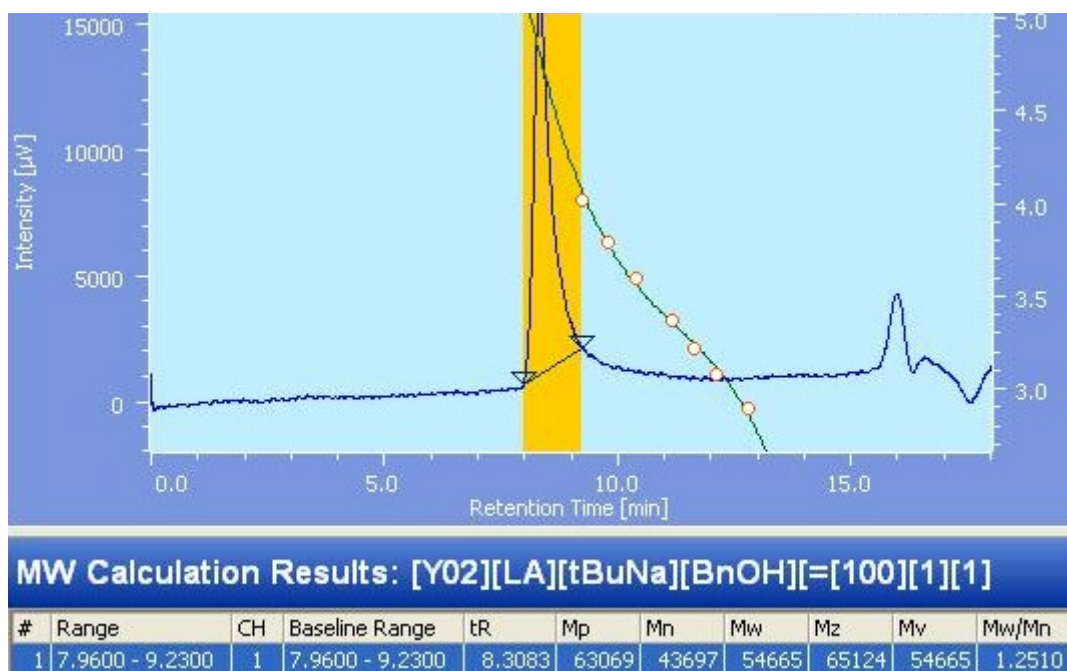

**Figure S29.** GPC result of PLA of entry 22

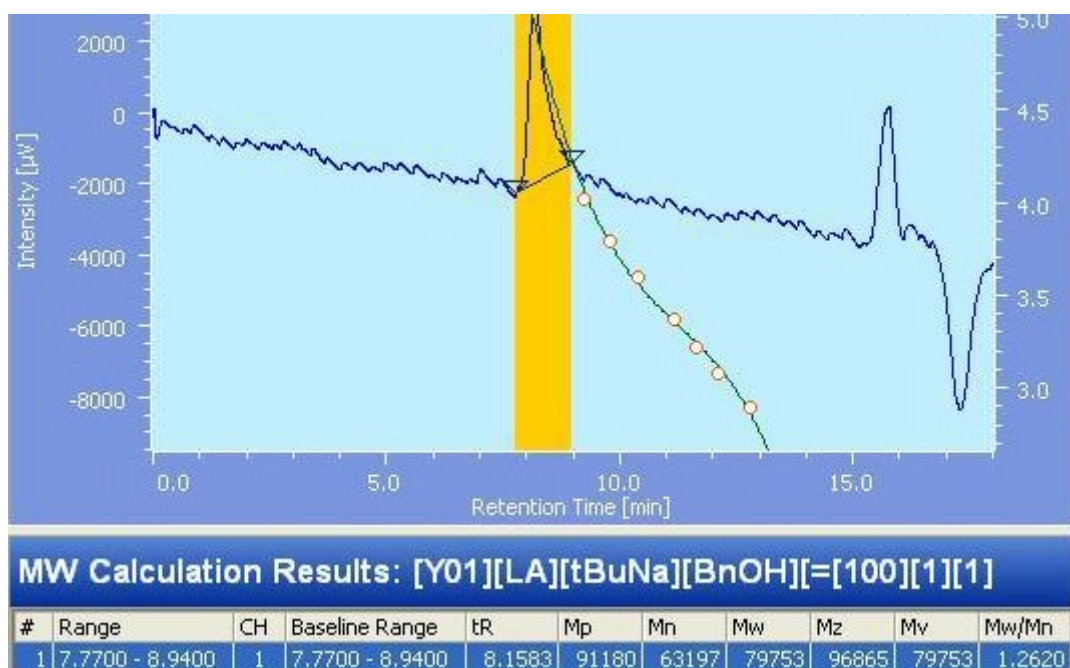

**Figure S30.** GPC result of PLA of entry 23

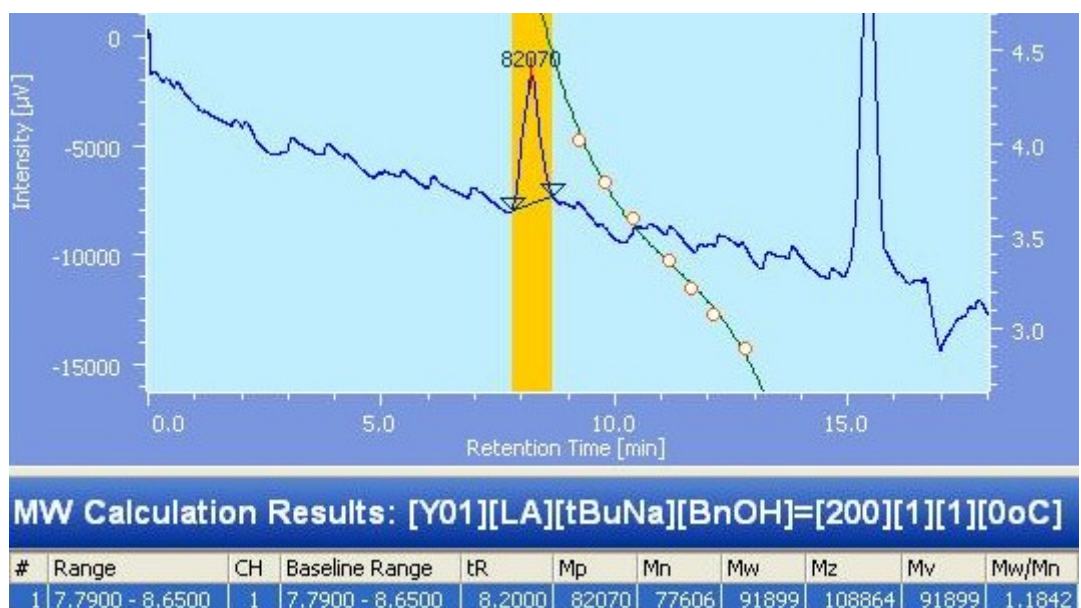

Figure S31. GPC result of PLA of entry 24

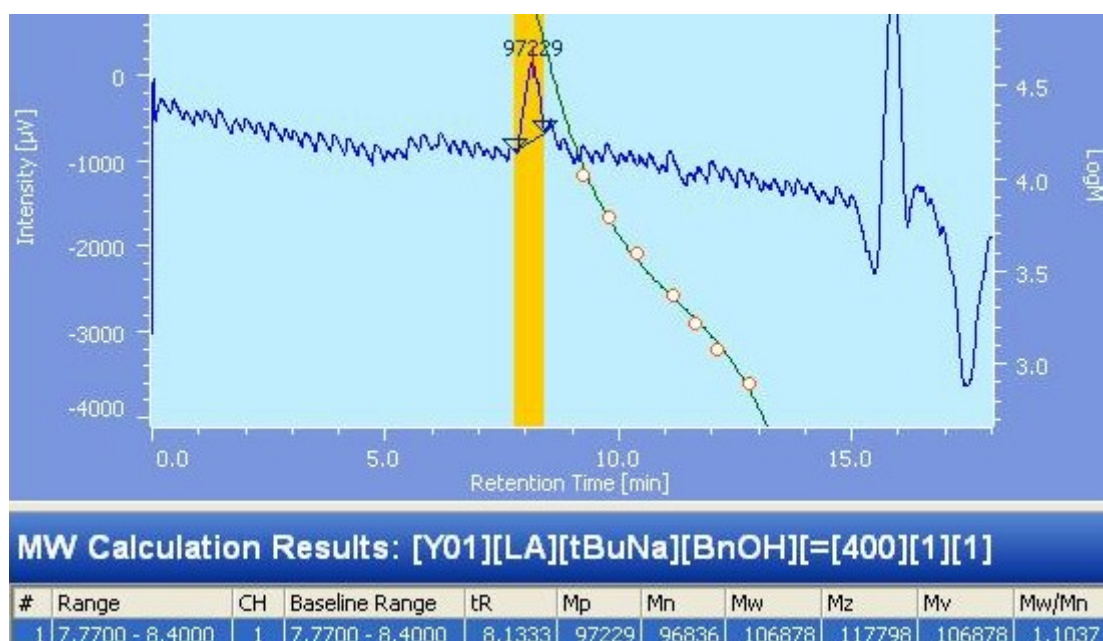

Figure S32. GPC result of PLA of entry 25



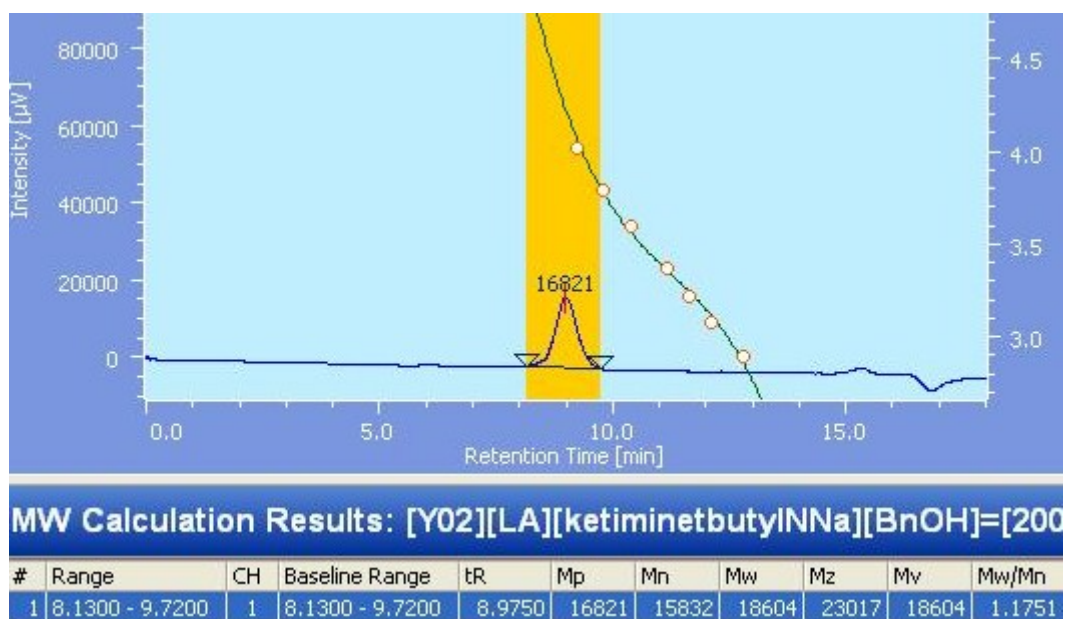

**Figure S33.** GPC result of PLA of entry 26
